# Supplementary material
Source: publisher site journal article supplement (https://www.dovepress.com/article/146395)
Supplement: Supplementary file 1 [file get_supplementary_file.php%3Ff%3D146395a.pdf]

Supplemental Table 1. ICD-9-CM diagnostic codes used to calculate Charlson Comorbidity Index

| <b>Comorbidity</b>                  | <b>ICD-9-CM</b>                                   |
|-------------------------------------|---------------------------------------------------|
| Acute myocardial infarction         | 410.x                                             |
| Old myocardial infarction           | 412.x                                             |
| Congestive heart failure            | 428.x                                             |
| Peripheral vascular disease         | 441.x, 443.9, 785.4, V43.4                        |
| Cerebrovascular disease             | 430.x – 438.x                                     |
| Chronic pulmonary disease           | 490.x – 496.x, 500.x – 505x, 506.4                |
| Dementia                            | 290.x                                             |
| Hemiplegia or paraplegia            | 342.x, 344.1                                      |
| Diabetes                            | 250.0 – 250.3, 250.7                              |
| Diabetes with chronic complications | 250.4 – 250.6, 250.8 – 250.9                      |
| Renal disease                       | 582.x , 583.x, 585.x, 586.x, 588.x                |
| Mild liver disease                  | 571.2, 571.4 – 571.6                              |
| Moderate to severe liver disease    | 572.2 – 572.8, 456.0 – 456.21                     |
| Peptic ulcer disease                | 531.x – 534.x                                     |
| Rheumatologic disease               | 710.0, 710.1, 710.4, 714.0 – 714.2, 714.81, 725.x |
| AIDS                                | 042.x – 044.x                                     |
