# Supplementary material
Source: publisher site journal article supplement (https://www.dovepress.com/article/146395)
Supplement: Supplementary file 2 [file get_supplementary_file.php%3Ff%3D146395b.pdf]

Supplemental Table 2. Sensitivity, specificity, positive predictive value (PPV), and negative predictive value (NPV) of OSHPD predicting specific comorbidities (calculated using SEER-Medicare as the gold standard)

| Condition                      | SEER-Medicare |       | OSHPD  |       | Agreement | Sensitivity | Specificity | PPV   | NPV   |
|--------------------------------|---------------|-------|--------|-------|-----------|-------------|-------------|-------|-------|
|                                | N             | %     | N      | %     |           |             |             |       |       |
| Diabetes- overall              | 75,856        | 21.07 | 74,041 | 20.57 | 92.11     | 80.08       | 95.32       | 82.04 | 94.71 |
| Diabetes without complications | 73,400        | 20.39 | 70,124 | 19.48 | 91.46     | 76.84       | 95.21       | 80.43 | 94.13 |
| Chronic pulmonary disease      | 68,920        | 19.15 | 91,935 | 25.54 | 85.21     | 78.08       | 86.90       | 58.53 | 94.36 |
| Congestive heart failure       | 45,883        | 12.75 | 53,165 | 14.77 | 89.58     | 67.05       | 92.87       | 57.87 | 95.07 |
| Peripheral vascular disease*   | 35,304        | 9.81  | 20,579 | 5.72  | 90.69     | 31.70       | 97.11       | 54.38 | 92.90 |
| Cerebrovascular disease        | 29,851        | 8.29  | 25,472 | 7.08  | 91.93     | 44.03       | 96.27       | 51.60 | 95.01 |
| Diabetes with complications    | 22,066        | 6.13  | 15,220 | 4.23  | 94.69     | 41.18       | 98.19       | 59.70 | 96.24 |
| Renal disease                  | 21,057        | 5.85  | 25,201 | 7.00  | 93.92     | 57.86       | 96.16       | 48.35 | 97.35 |
| Dementia                       | 12,794        | 3.55  | 8,343  | 2.32  | 96.26     | 30.01       | 98.70       | 46.01 | 97.45 |
| Rheumatologic disease          | 9,870         | 2.74  | 7,886  | 2.19  | 98.15     | 56.29       | 99.33       | 70.45 | 98.77 |
| Old myocardial infarction      | 9,077         | 2.52  | 23,425 | 6.51  | 95.06     | 81.04       | 95.42       | 31.40 | 99.49 |
| Peptic ulcer disease           | 8,648         | 2.40  | 15,350 | 4.26  | 96.12     | 58.00       | 97.06       | 32.68 | 98.95 |
| Acute myocardial infarction    | 5,660         | 1.57  | 9,907  | 2.75  | 97.79     | 67.30       | 98.28       | 38.45 | 99.47 |
| Liver disease- overall         | 5,540         | 1.54  | 9,112  | 2.53  | 97.95     | 65.56       | 98.45       | 39.86 | 99.46 |
| Liver disease - mild           | 5,116         | 1.42  | 6,772  | 1.88  | 98.50     | 63.51       | 99.01       | 47.98 | 99.47 |
| Hemiplegia or paraplegia       | 4,132         | 1.15  | 8,202  | 2.28  | 97.92     | 58.64       | 98.38       | 29.54 | 99.51 |
| Liver disease- moderate/severe | 1,585         | 0.44  | 5,139  | 1.43  | 98.83     | 79.05       | 98.92       | 24.38 | 99.91 |
| AIDS                           | 290           | 0.08  | 182    | 0.05  | 99.95     | 52.07       | 99.99       | 82.97 | 99.96 |

\*OSHPD claims lacked ICD-9 procedure codes which limited our ability to detect this condition.
