# Supplementary material
Source: publisher site journal article supplement (https://www.dovepress.com/article/146395)
Supplement: Supplementary file 3 [file get_supplementary_file.php%3Ff%3D146395c.pdf]

**Supplemental Table 3A. Distribution of Charlson comorbidity score using encounters only from the 12 months prior to diagnosis compared to using encounters from 12 months prior to 6 months following diagnosis**

| Charlson Comorbidity Score | Comorbidity score based on including only encounters in the 12 months prior to diagnosis<br>N= 1,560,936 |        | Comorbidity score based on including 12 months prior and 6 months after diagnosis<br>N= 2,583,704 |        |
|----------------------------|----------------------------------------------------------------------------------------------------------|--------|---------------------------------------------------------------------------------------------------|--------|
|                            | N                                                                                                        | %      | N                                                                                                 | %      |
| 0                          | 894,481                                                                                                  | 57.30% | 1,554,800                                                                                         | 60.18% |
| 1                          | 352,214                                                                                                  | 22.56% | 570,080                                                                                           | 22.06% |
| 2                          | 150,253                                                                                                  | 9.63%  | 220,191                                                                                           | 8.52%  |
| 3 or higher                | 163,988                                                                                                  | 10.51% | 238,633                                                                                           | 9.24%  |

**Supplemental Table 3B. Prevalence of Charlson comorbidity index conditions identified by including encounters from different time windows**

| Comorbidity                            | Prevalence of conditions in cases with encounters 12 months prior to diagnosis only | Prevalence of conditions in cases with encounters 12 months prior to diagnosis to 6 months after diagnosis | Prevalence of conditions in extra cases added* by extending time window to 6 months after diagnosis |
|----------------------------------------|-------------------------------------------------------------------------------------|------------------------------------------------------------------------------------------------------------|-----------------------------------------------------------------------------------------------------|
| Acute myocardial infarction            | 1.73%                                                                               | 1.78%                                                                                                      | 0.76%                                                                                               |
| Old myocardial infarction              | 4.42%                                                                               | 4.44%                                                                                                      | 2.29%                                                                                               |
| Congestive heart failure               | 9.21%                                                                               | 8.72%                                                                                                      | 3.50%                                                                                               |
| Peripheral vascular disease            | 3.54%                                                                               | 3.43%                                                                                                      | 1.51%                                                                                               |
| Cerebrovascular disease                | 4.78%                                                                               | 4.64%                                                                                                      | 1.97%                                                                                               |
| Chronic pulmonary disease              | 18.84%                                                                              | 19.06%                                                                                                     | 12.54%                                                                                              |
| Dementia                               | 1.12%                                                                               | 1.01%                                                                                                      | 0.31%                                                                                               |
| Hemiplegia or paraplegia               | 1.72%                                                                               | 1.90%                                                                                                      | 0.84%                                                                                               |
| Diabetes with or without complications | 16.87%                                                                              | 16.31%                                                                                                     | 11.31%                                                                                              |
| Chronic renal failure                  | 5.74%                                                                               | 5.74%                                                                                                      | 2.28%                                                                                               |
| Mild liver disease/Cirrhodities        | 2.14%                                                                               | 2.03%                                                                                                      | 1.00%                                                                                               |
| Moderate to severe liver disease       | 1.41%                                                                               | 1.53%                                                                                                      | 0.69%                                                                                               |
| Peptic Ulcer disease                   | 3.22%                                                                               | 3.03%                                                                                                      | 1.18%                                                                                               |
| Rheumatologic disease                  | 1.59%                                                                               | 1.59%                                                                                                      | 1.03%                                                                                               |
| AIDS                                   | 0.80%                                                                               | 0.70%                                                                                                      | 0.38%                                                                                               |

\*extra cases added are those that only had encounters in the 6 months after cancer diagnosis

**Supplemental Table 3C. Frequency distribution of comorbid conditions identified by using encounters from the 12 months preceding cancer diagnosis compared to conditions identified from encounters in the 6 months following cancer diagnosis**

| Comorbidity                            | Frequency of comorbid conditions identified by encounters in the 12 months preceding cancer diagnosis |        | Frequency of comorbid conditions identified by encounters in the 6 months following cancer diagnosis |        |
|----------------------------------------|-------------------------------------------------------------------------------------------------------|--------|------------------------------------------------------------------------------------------------------|--------|
|                                        | N                                                                                                     | %      | N                                                                                                    | %      |
| Acute myocardial infarction            | 26,964                                                                                                | 2.24%  | 18,953                                                                                               | 2.50%  |
| Old myocardial infarction              | 68,960                                                                                                | 5.73%  | 45,780                                                                                               | 6.04%  |
| Congestive heart failure               | 143,727                                                                                               | 11.94% | 81,609                                                                                               | 10.77% |
| Peripheral vascular disease            | 55,204                                                                                                | 4.59%  | 33,428                                                                                               | 4.41%  |
| Cerebrovascular disease                | 74,638                                                                                                | 6.20%  | 45,238                                                                                               | 5.97%  |
| Chronic pulmonary disease              | 294,006                                                                                               | 24.43% | 198,408                                                                                              | 26.18% |
| Dementia                               | 17,520                                                                                                | 1.46%  | 8,625                                                                                                | 1.14%  |
| Hemiplegia or paraplegia               | 26,909                                                                                                | 2.24%  | 22,187                                                                                               | 2.93%  |
| Diabetes with or without complications | 263,363                                                                                               | 21.88% | 158,139                                                                                              | 20.86% |
| Chronic renal failure                  | 89,535                                                                                                | 7.44%  | 58,740                                                                                               | 7.75%  |
| Mild liver disease/Cirrhodities        | 33,364                                                                                                | 2.77%  | 19,056                                                                                               | 2.51%  |
| Moderate to severe liver disease       | 22,056                                                                                                | 1.83%  | 17,565                                                                                               | 2.32%  |
| Peptic Ulcer disease                   | 50,223                                                                                                | 4.17%  | 28,191                                                                                               | 3.72%  |
| Rheumatologic disease                  | 24,760                                                                                                | 2.06%  | 16,332                                                                                               | 2.15%  |
| AIDS                                   | 12,430                                                                                                | 1.03%  | 5,675                                                                                                | 0.75%  |
| Total conditions identified            | 1,203,659                                                                                             | 100%   | 757,926                                                                                              | 100%   |

**Supplemental Table 3D. Association of comorbidity score with mortality among California cancer patients. Comparison of multivariate\* model results.**

| Characteristic             | Value       | Comorbidity score based on including only encounters in the 12 months prior to diagnosis |                                    |       | Comorbidity score based on including 12 months prior and 6 months after diagnosis |                                    |       |
|----------------------------|-------------|------------------------------------------------------------------------------------------|------------------------------------|-------|-----------------------------------------------------------------------------------|------------------------------------|-------|
|                            |             | Hazard ratio                                                                             | 95% Hazard Ratio Confidence Limits |       | Hazard ratio                                                                      | 95% Hazard Ratio Confidence Limits |       |
|                            |             |                                                                                          | Lower                              | Upper |                                                                                   | Lower                              | Upper |
| Charlson Comorbidity Score | 0           | <i>reference</i>                                                                         |                                    |       | <i>reference</i>                                                                  |                                    |       |
|                            | 1           | 1.43                                                                                     | 1.42                               | 1.43  | 1.50                                                                              | 1.49                               | 1.50  |
|                            | 2           | 1.67                                                                                     | 1.66                               | 1.68  | 1.79                                                                              | 1.78                               | 1.80  |
|                            | 3 or higher | 2.09                                                                                     | 2.08                               | 2.10  | 2.33                                                                              | 2.32                               | 2.34  |

\*covariates included age at diagnosis, sex, race/ethnicity, quintile of neighborhood socioeconomic status, and SEER summary stage
